# Supplementary material for: Stress-induced changes in the expression of antioxidant system genes for rice (Oryza sativa L.) and bread wheat (Triticum aestivum L.)
Source: PeerJ. 2019 Nov 29;7:e7791. doi: 10.7717/peerj.7791 (PMC6886489; doi:10.7717/peerj.7791)
Supplement: Supplemental Information 1 — The “Organism” column contains the names of the species, the ID reflects the corresponding card number from the GEO database. The “Title” column contains the experiment titles given from the GEO accession pages. The “Conditions” column represents the details of the stress conditions used in the experiment. The “Type” column reflects the measurement technology for genes expression (microarray or next- generation sequencing). The “Tissue” column indicates a tissue used for expression analysis by researchers. [file peerj-07-7791-s001.xlsx]

## Sheet: Лист1
ORGANISM	ID	CONDITIONS	TYPE	TISSUE
Oryza sativa	GSE21651	salt stress, drought	array	leaf
Oryza sativa	GSE23211	drought	array	leaf
Oryza sativa	GSE24048	drought	array	leaf
Oryza sativa	GSE25176	drought	array	leaf
Oryza sativa	GSE26280	drought	array	leaf
Oryza sativa	GSE37940	cold	array	shoot
Oryza sativa	GSE38023	cold stress	array	leaf
Oryza sativa	GSE41647	drought	array	seedling
Oryza sativa	GSE4438	salt stress/drought/cold	array	shoot
Oryza sativa	GSE54466	drought	array	leaf
Oryza sativa	GSE64576	drought	array	leaf
Oryza sativa	GSE65024	drought	NGS	leaf
Oryza sativa	GSE65025	drought	NGS	leaf
Oryza sativa	GSE67373	cold	NGS	seedling
Oryza sativa	GSE6901	salt stress/drought/cold	array	seedling
Oryza sativa	GSE71680	cold	array	shoot + leaf
Oryza sativa	GSE74465	drought	NGS	whole plant
Oryza sativa	GSE78972	drought	NGS	leaf
Oryza sativa	GSE80811	drought	NGS	leaf
Oryza sativa	GSE81462	drought	NGS	shoot
Oryza sativa	GSE83378	drought	array	young panicles
Oryza sativa	GSE83912	cold	array	shoot + leaf
Triticum aestivum	GSE23889	cold	array	seedling
Triticum aestivum	GSE30436	drought	array	leaf
Triticum aestivum	GSE31762	drought	array	phyllome
Triticum aestivum	GSE42214	drought	array	root
Triticum aestivum	GSE45563	drought	array	leaf
Triticum aestivum	GSE47090	drought	array	leaf
Triticum aestivum	GSE79522	drought	NGS	leaf
