# Supplementary material for: Stress-induced changes in the expression of antioxidant system genes for rice (Oryza sativa L.) and bread wheat (Triticum aestivum L.)
Source: PeerJ. 2019 Nov 29;7:e7791. doi: 10.7717/peerj.7791 (PMC6886489; doi:10.7717/peerj.7791)
Supplement: Supplemental Information 2 — The data are given for the clusters of experimental replicates indicating cold response (CR) and water deficiency response (WDR) identified in the present work. The rows display the Fold Change of Gene expression values (red is for upregulated genes, green is for downregulated genes) and the corresponding confidence value counted for the gene (bold font is for reliable values). The Enzymatic class header breaks genes into relevant classes (ascorbate peroxidase (APX), catalase (CAT), dehydroascorbate reductase (DHAR), glutathione peroxidase (GPX), glutathione reductase (GR), monodehydroascorbate reductase (MDHAR), superoxide dismutase (SOD)). [file peerj-07-7791-s002.xlsx]

## Sheet: TABLE
CLUSTER	DATA	Enzymatic Class
		APX									CAT			DHAR		GR
		OS08G41090 (APX A)	OS04G14680 (APX H)	OS04G35520 (APX C)	OS02G34810 (APX B)	OS12G07820 (APX D)	OS12G07830 (APX D)	OS07G49400 (APX F)	OS08G43560 (APX G)	OS03G17690 (APX E)	OS06G51150 (CAT A)	OS03G03910 (CAT B)	OS02G02400 (CAT C)	OS05G02530 (DHAR B)	OS06G12630 (DHAR A)	OS02G56850 (GR B)	OS10G28000 (GR A)	OS03G06740 (GR A)
CR1	RGE	0.440468	3.41286	0.529531	0.748773	0.527796	0.573769	0.44395	0.755269	1.15444	0.741101	0.842934	0.253701	0.447677	0.471249	0.402038	2.38001	0.693275
	E-val.	3.68305e-07	<1E,00-20	1.51664e-05	0.0555657	1.2654e-05	0.000579902	3.4276e-07	0.0482286	0.350116	0.0511024	0.408211	6.18587e-11	6.56938e-07	3.21524e-06	6.11019e-08	4e-20	0.0119313
CR2	RGE	0.92379	1.05918	0.838187	0.562534	0.455835	0.312907	0.51403	0.876441	1.08152	0.898271	0.896034	0.230885	0.215389	0.263964	0.591452	5.22118	0.300473
	E-val.	1	1	0.768478	0.000175226	1.81665e-06	5.21155e-09	3.69295e-05	1	1	1	1	2.16775e-10	1.50214e-10	8.55312e-10	0.000445852	<1,00E-20	3.39791e-09
CR3	RGE	1.23807	1.25302	0.536264	0.766047	0.413348	0.7029	0.305434	0.690106	0.919169	0.728073	0.783222	0.733325	0.323286	0.24438	0.379438	1.06587	0.435742
	E-val.	0.525422	0.484551	0.0206982	0.666025	0.00240285	0.342235	0.000326742	0.292201	1	0.477949	0.800093	0.484551	0.000393717	0.000121871	0.00138236	1	0.00363936
CR4	RGE	0.943066	1.15795	0.68644	0.648291	0.428272	0.506272	0.315307	0.694135	0.904381	0.79963	0.743405	0.5414	0.226555	0.218608	0.408963	2.31185	0.375075
	E-val.	1	0.366967	0.0088665	0.000999168	2.23722e-08	1.95563e-06	2.07265e-10	0.00425523	1	0.120902	0.0214568	7.03365e-06	1.34827e-12	1.2662e-12	1.57936e-08	3e-20	2.54585e-09
CR5	RGE	0.398389	1.72072	0.654601	0.802784	0.637994	0.63353	0.518053	0.833204	0.919623	0.652057	0.825936	0.506151	0.638358	0.607732	0.71447	1.25426	0.807602
	E-val.	3.184e-13	2.09446e-11	9.19973e-10	9.19973e-10	9.16497e-07	2.65959e-06	5.18126e-06	1.26579e-05	4.12471e-05	4.85701e-05	5.3553e-05	6.39735e-05	9.85641e-05	9.85641e-05	0.0121026	0.0128685	0.0167706
WDR1	RGE	0.12922	5.16347	0.523157	0.75154	0.930835	0.262941	0.815303	0.54773	0.884346	1.98706	0.718109	0.209022	0.852625	0.29655	1.95387	4.6418	0.55569
	E-val.	7.92962e-05	<1E,00-20	0.0671206	0.974142	1	0.00088955	1	0.0927898	1	5.89493e-06	0.710499	0.000327945	1	0.00146423	1.09205e-05	<1E,00-20	0.0996634
WDR2	RGE	0.534503	1.55135	0.34999	0.152594	0.371325	0.45504	0.319424	0.141264	0.904225	1.72019	0.152943	0.255451	0.598898	0.08494	1.38065	1.71514	0.173461
	E-val.	0.00553795	0.00311688	1.35814e-14	1e-20	2.23364e-14	8.18143e-11	5.91e-17	<1,00E-20	0.979496	1.70305e-10	<1,00E-20	1.6136e-16	2.85505e-06	<1,00E-20	9.4875e-05	1.64664e-05	<1,00E-20
WDR3	RGE	0.658649	0.66811	0.366552	0.916347	0.385008	0.456515	0.494207	0.504614	0.871599	0.92679	0.921054	0.265868	0.752171	0.525727	0.677741	1.2833	0.586749
	E-val.	0.182768	0.204506	0.00198673	1	0.00236701	0.00669325	0.0138212	0.0156748	1	1	1	0.000429613	0.587399	0.0191341	0.227983	0.318804	0.0619667
WDR4	RGE	0.208948	0.813119	0.581491	0.474748	0.402932	0.286281	0.573595	0.528133	0.694017	0.888978	0.431877	0.3549	0.699826	0.33628	0.907325	1.05783	0.319838
	E-val.	2.65e-18	0.204665	4.29817e-08	2.9646e-11	1.32641e-13	5.6699e-16	4.29817e-08	4.61932e-09	6.00309e-05	0.796993	5.83029e-12	1.75247e-14	0.000117968	3.77395e-15	0.920159	1	1.18188e-15
WDR5	RGE	0.84884	1.1908	1.09628	0.625997	1.02478	1.00771	0.776367	0.647455	1.2888	1.20678	0.720735	0.616086	1.14328	0.651053	1.1025	1.65016	0.9902
	E-val.	0.184074	0.384801	1	2.36621e-14	1	1	2.15716e-06	1.55216e-11	0.186976	0.00290847	1.57723e-08	1.65544e-08	0.00622912	1.26133e-13	0.453572	2.24917e-10	1
WDR6	RGE	0.788658	3.81302	0.481201	2.3604	1.03671	0.765079	0.701428	0.695253	0.947452	0.709348	0.964196	0.804965	1.41075	1.25201	0.892184	1.51735	1.19814
	E-val.	0.0404847	2.4004e-15	2.4004e-15	1.30905e-09	1	0.00616141	8.5447e-11	9.57557e-12	1	1.29361e-14	1	0.0404847	4.02892e-07	0.0312656	0.0404847	5.64408e-07	0.000635692
CLUSTER	DATA	Enzymatic Class
		GPX					MDHAR					SOD
		OS06G08670 (GPX A)	OS03G24380 (GPX F)	OS11G18170 (GPX B)	OS04G46960 (GPX E)	OS02G44500 (GPX D)	OS09G39380 (MDHAR A)	OS08G44340 (MDHAR A)	OS02G47800 (MDHAR C)	OS02G47790 (MDHAR D)	OS08G05570 (MDHAR B)	OS04G48410 (SOD G)	OS06G05110 (SOD B)	OS06G02500 (SOD A)	OS03G22810 (SOD E)	OS07G46990 (SOD E)	OS03G11960 (SOD D)	OS08G44770 (SOD F)	OS05G25850 (SOD C)
CR1	RGE	0.754574	0.541276	0.346769	1.58068	1.44953	0.392785	2.91934	0.53397	0.745431	0.594039	0.625633	0.796753	0.677434	0.710169	0.841713	0.863697	0.562798	0.664207
	E-val.	0.0482286	2.04438e-05	9.15762e-09	7.13455e-08	0.0119522	4.98591e-08	<1,00E-20	2.07304e-05	0.0414343	0.000166312	0.000779898	0.138381	0.00886389	0.0119313	0.397175	0.654716	7.17858e-05	0.00247336
CR2	RGE	0.820716	0.652549	0.380947	1.6975	0.879964	0.337229	3.15055	0.619505	0.736622	0.42957	0.379717	0.603533	0.17308	0.453703	0.715008	0.918438	0.275814	0.405902
	E-val.	0.425618	0.00496565	1.54901e-07	3.39791e-09	1	1.36678e-08	<1,00E-20	0.00137	0.0528036	6.36332e-07	9.64438e-08	0.000794813	2.207e-11	1.67362e-06	0.0255819	1	1.53346e-09	2.31744e-07
CR3	RGE	0.73947	0.634699	0.453544	1.02831	0.570733	0.278826	0.900158	0.811173	0.952719	0.405382	0.474174	0.979984	0.199664	0.460024	0.664131	0.891415	0.478123	0.447922
	E-val.	0.495657	0.12759	0.00479931	1	0.0401651	0.00020232	1	1	1	0.00222995	0.00613643	1	7.19144e-05	0.00479931	0.201092	1	0.00644046	0.00440004
CR4	RGE	0.706627	0.602034	0.398398	1.24581	0.803936	0.247643	1.71687	0.62431	0.74092	0.405065	0.435349	0.770365	0.20263	0.464482	0.672122	0.814472	0.421432	0.446145
	E-val.	0.00747463	0.000147003	1.22112e-08	0.0216745	0.214566	3.47154e-12	1.27162e-09	0.000248014	0.0210009	8.43315e-09	2.71645e-08	0.0483817	8.40733e-13	1.08991e-07	0.00155189	0.177563	1.57936e-08	4.87581e-08
CR5	RGE	0.834709	0.78805	0.642537	1.08069	0.723668	0.59127	1.22322	0.733237	0.953164	0.667936	0.698534	0.899694	0.757737	0.742168	0.865758	0.875005	0.752549	0.735855
	E-val.	9.85641e-05	0.00082058	0.00455777	0.00543335	0.00941394	0.0201798	0.0380468	0.163087	0.294734	0.363418	0.641544	0.821313	0.864577	1	1	1	1	1
WDR1	RGE	0.258692	2.16955	0.280404	1.01673	1.79464	0.881617	3.88646	0.436658	0.203714	0.797056	1.50773	0.81008	0.115744	0.96304	2.36736	0.598664	0.608557	2.85361
	E-val.	0.000839731	1.00838e-07	0.00113328	1	0.000292895	1	<1,00E-20	0.0182138	0.000324881	1	0.0335311	1	6.50048e-05	1	1.11374e-09	0.175918	0.19325	1.09408e-14
WDR2	RGE	0.157333	1.06788	0.187618	0.845737	0.557409	0.360108	1.1838	0.215443	0.270956	0.339709	0.647484	0.388648	0.196728	0.536698	1.75321	0.24679	0.257495	1.67993
	E-val.	<1,00E-20	1	<1,00E-20	0.426341	4.8331e-09	4.5306e-16	0.0686933	<1,00E-20	8.7e-19	1.6136e-16	1.39912e-06	1.28293e-13	9e-20	1.87968e-08	6.53369e-11	6e-20	1.3e-19	8.59924e-13
WDR3	RGE	0.612727	0.628082	0.396216	0.728225	0.613442	0.351433	1.0144	0.708023	0.516539	0.450975	1.00976	0.959016	0.509632	0.404255	0.771255	1.0908	0.754375	0.825044
	E-val.	0.0907873	0.112349	0.00250078	0.439641	0.0907873	0.00198673	1	0.338859	0.0170241	0.00665344	1	1	0.0160112	0.00254464	0.714798	1	0.587399	1
WDR4	RGE	0.471787	0.876373	0.343906	0.908298	1.40774	0.46666	1.65986	0.375839	0.929904	0.499633	0.577037	0.365989	0.239466	0.582562	0.783427	0.479377	0.541399	0.581743
	E-val.	3.26836e-11	0.461232	8.28064e-15	1	0.000308247	1.13222e-11	4.29817e-08	3.39677e-14	1	1.08243e-10	4.20679e-08	4.10135e-13	1.628e-17	2.63941e-08	0.0117486	2.31207e-11	2.61643e-09	1.0449e-07
WDR5	RGE	0.610791	1.2777	0.711325	0.856536	0.847839	0.82105	1.4854	0.628974	0.742256	1.08916	1.27739	1.09028	1.0985	0.907333	2.3035	1.04662	1.14409	1.51811
	E-val.	8.83482e-10	8.40263e-07	3.37411e-06	0.0024875	0.0198637	5.67417e-08	2.70773e-06	<1,00E-20	0.0339397	0.715329	1.97962e-05	0.490556	0.999271	1	2.04e-18	1	0.0506238	1.11657e-10
WDR6	RGE	0.88855	0.896629	0.751868	0.652317	0.990833	1.17614	0.642313	0.747887	0.802665	0.79855	1.46687	1.28741	1.28862	0.894412	2.68893	0.8165	2.01639	1.58091
	E-val.	0.277597	0.0205728	0.000180996	9.5486e-15	1	0.108575	1.18133e-12	1.28234e-10	0.0324314	4.0805e-06	4.56637e-09	0.000122427	0.00395952	0.791564	<1,00E-20	0.0219061	<1,00E-20	<1,00E-20
